# Supplementary material for: Complementary Role of Fibroblast Growth Factor 21 and Cytokeratin 18 in Monitoring the Different Stages of Nonalcoholic Fatty Liver Disease
Source: PubMed Central journal article supplement (PMC5506050; doi:10.1038/s41598-017-05257-5), 2017-07-11
Supplement: 41598_2017_5257_MOESM1_ESM.pdf [file 41598_2017_5257_MOESM1_ESM.pdf]

**Complementary Role of Fibroblast Growth Factor 21 and Cytokeratin 18 in  
Monitoring the Different Stages of Nonalcoholic Fatty Liver Disease**

Guangyu Wu<sup>†</sup>, Huating Li<sup>†</sup>, Qichen Fang, Jing Zhang, Mingliang Zhang, Lei Zhang,  
Liang Wu, Xuhong Hou, Junxi Lu, Yuqian Bao, and Weiping Jia\*

**Supplementary Information**

Supplementary Figure S1 Flow chart of the study.

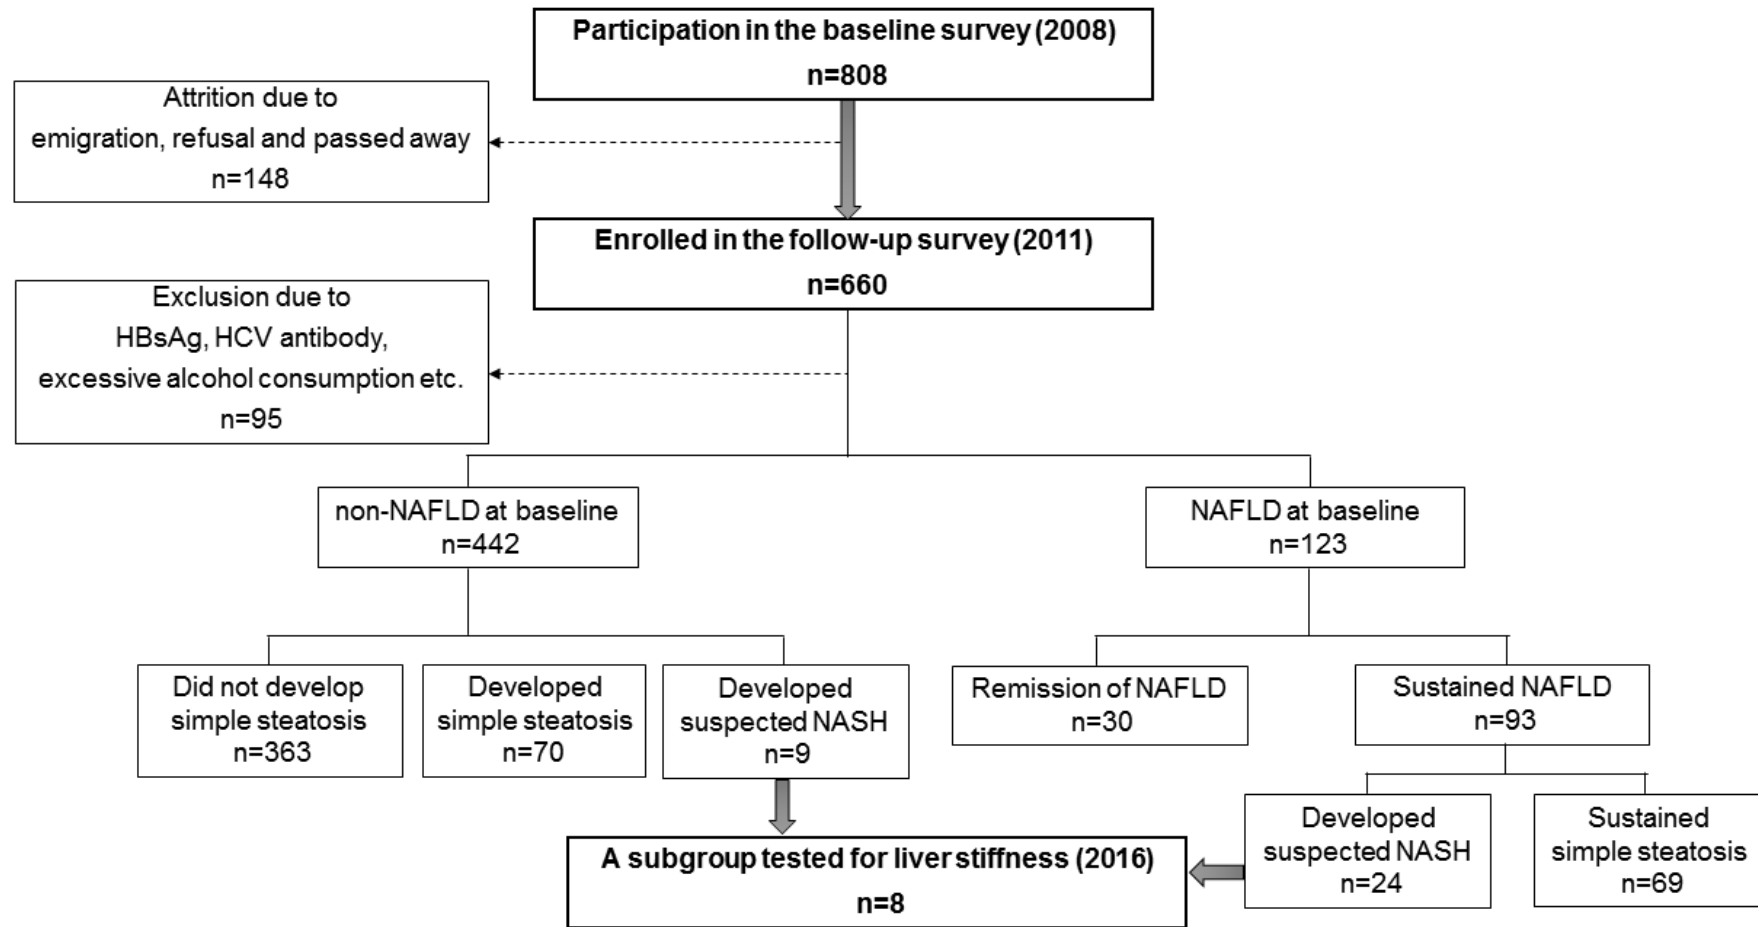

**Supplementary Figure S2** Expression of FGF21, CK18, CK18 M30 and apoptosis marker in human liver tissue examined by immunohistochemistry staining.

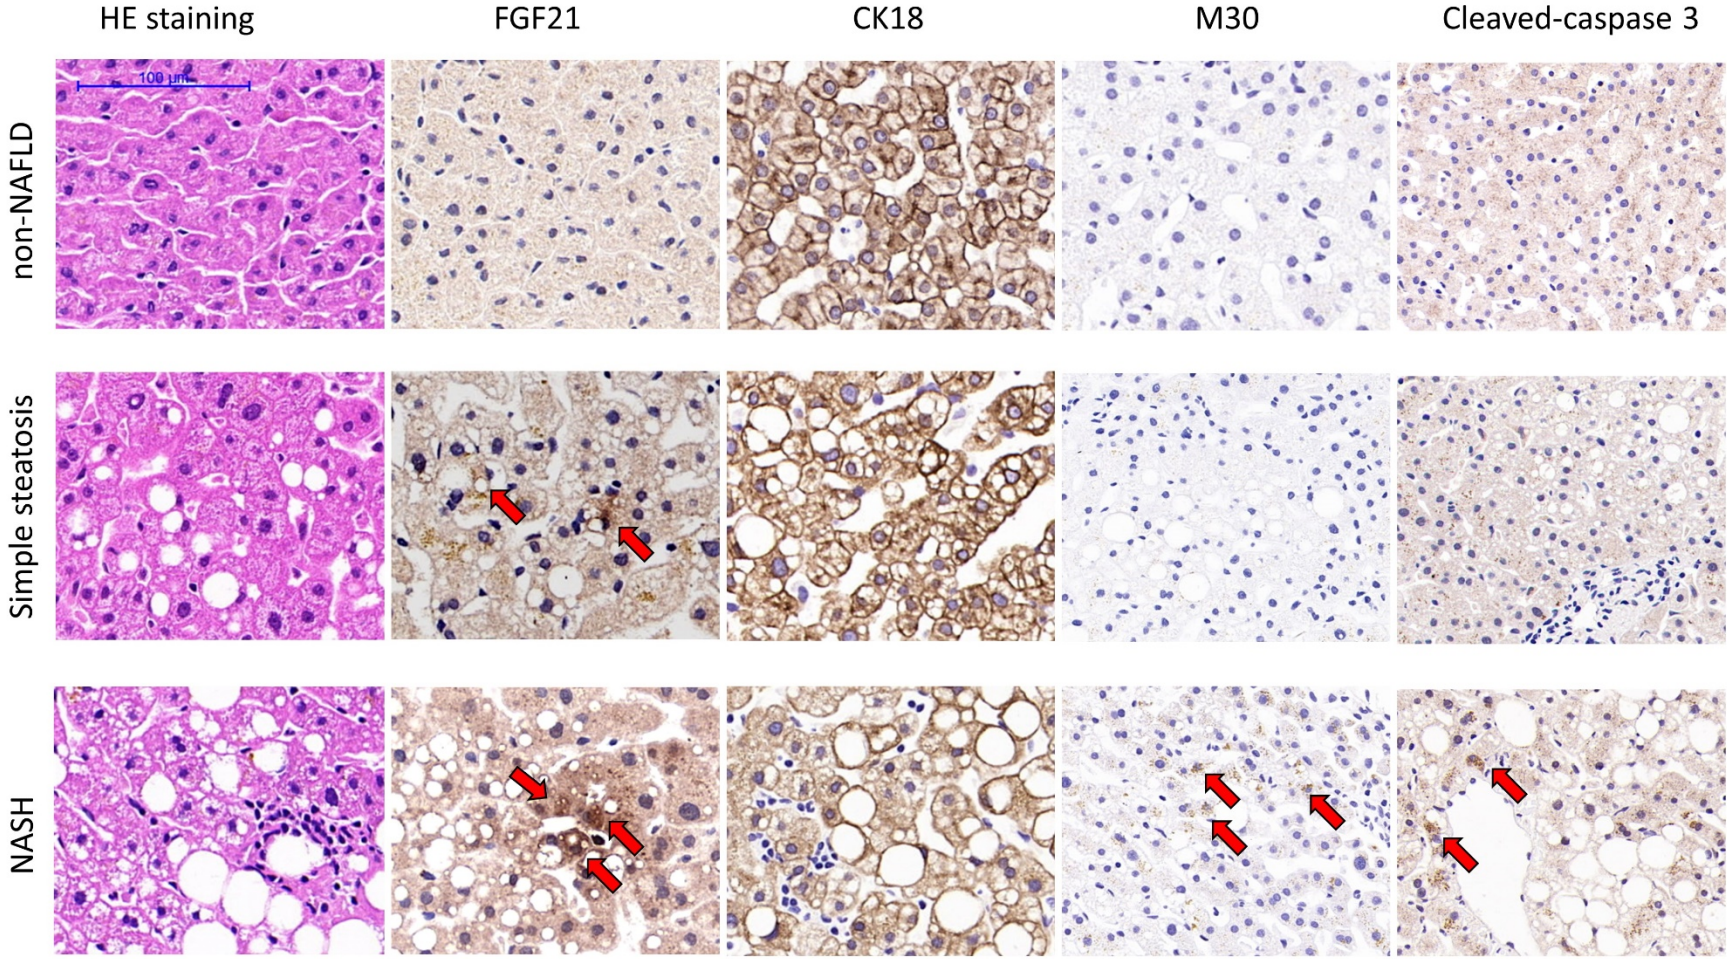

**Supplementary Table S1** Pearson and partial correlations between baseline FGF21 and cell death biomarkers and clinical parameters in total cohort.

| Baseline variables               | FGF21  |        | CK18 M30 |        | CK18 M65ED |        | Adjusted for age and BMI |        |          |        |            |        |
|----------------------------------|--------|--------|----------|--------|------------|--------|--------------------------|--------|----------|--------|------------|--------|
|                                  |        |        |          |        |            |        | FGF21                    |        | CK18 M30 |        | CK18 M65ED |        |
|                                  | r      | p      | r        | p      | r          | p      | r                        | p      | r        | p      | r          | p      |
| Age (years)                      | 0.303  | <0.001 | -0.049   | 0.261  | 0.288      | <0.001 |                          |        |          |        |            |        |
| BMI (kg/m <sup>2</sup> )         | 0.324  | <0.001 | 0.094    | 0.032  | 0.208      | <0.001 |                          |        |          |        |            |        |
| Waist circumference (cm)         | 0.418  | <0.001 | 0.090    | 0.039  | 0.296      | <0.001 | 0.244                    | <0.001 | 0.037    | 0.395  | 0.186      | <0.001 |
| SBP (mmHg)                       | 0.301  | <0.001 | 0.023    | 0.603  | 0.303      | <0.001 | 0.105                    | 0.019  | 0.016    | 0.711  | 0.158      | <0.001 |
| DBP (mmHg)                       | 0.313  | <0.001 | 0.050    | 0.257  | 0.302      | <0.001 | 0.146                    | 0.001  | 0.034    | 0.440  | 0.182      | <0.001 |
| ALT (IU/L) <sup>§</sup>          | 0.220  | <0.001 | 0.239    | <0.001 | 0.546      | <0.001 | 0.097                    | 0.029  | 0.227    | <0.001 | 0.516      | <0.001 |
| AST (IU/L) <sup>§</sup>          | 0.180  | <0.001 | 0.176    | <0.001 | 0.543      | <0.001 | 0.037                    | 0.411  | 0.188    | <0.001 | 0.480      | <0.001 |
| GGT (IU/L) <sup>§</sup>          | 0.327  | <0.001 | 0.154    | <0.001 | 0.409      | <0.001 | 0.207                    | <0.001 | 0.141    | 0.001  | 0.343      | <0.001 |
| TC (mmol/L)                      | 0.283  | <0.001 | 0.095    | 0.029  | 0.257      | <0.001 | 0.184                    | <0.001 | 0.106    | 0.015  | 0.168      | <0.001 |
| TG (mmol/L) <sup>§</sup>         | 0.450  | <0.001 | 0.051    | 0.242  | 0.348      | <0.001 | 0.342                    | <0.001 | 0.023    | 0.599  | 0.268      | <0.001 |
| HDL-C (mmol/L)                   | -0.257 | <0.001 | -0.003   | 0.937  | -0.148     | 0.001  | -0.181                   | <0.001 | 0.030    | 0.488  | -0.095     | 0.029  |
| LDL-C (mmol/L)                   | 0.139  | 0.002  | 0.107    | 0.014  | 0.132      | 0.002  | 0.060                    | 0.182  | 0.106    | 0.016  | 0.068      | 0.122  |
| FPG (mmol/L)                     | 0.049  | 0.267  | 0.078    | 0.073  | 0.158      | <0.001 | -0.013                   | 0.768  | 0.069    | 0.113  | 0.122      | 0.005  |
| 2hPG (mmol/L)                    | 0.157  | <0.001 | 0.091    | 0.037  | 0.238      | <0.001 | 0.044                    | 0.326  | 0.092    | 0.035  | 0.156      | <0.001 |
| HbA1c (%)                        | 0.096  | 0.031  | 0.070    | 0.112  | 0.237      | <0.001 | -0.020                   | 0.655  | 0.075    | 0.087  | 0.156      | <0.001 |
| Adiponectin (µg/ml) <sup>§</sup> | -0.194 | <0.001 | -0.109   | 0.015  | -0.146     | 0.001  | -0.166                   | <0.001 | -0.064   | 0.153  | -0.157     | <0.001 |

<sup>§</sup>Ln transformed before analysis.

**Supplementary Table S2** Baseline clinical parameters of 70 subjects who developed simple steatosis and 363 subjects who did not during 3-year follow-up.

| Baseline variables               | NAFLD state at 3 years                   |                                   | P value |
|----------------------------------|------------------------------------------|-----------------------------------|---------|
|                                  | Did not develop simple steatosis (n=363) | Developed simple steatosis (n=70) |         |
| M/F                              | 131/232                                  | 24/46                             | 0.684   |
| Age (years)                      | 44.50 ± 12.86                            | 51.72 ± 13.32                     | <0.001  |
| BMI (kg/m <sup>2</sup> )         | 22.09 ± 2.72                             | 24.80 ± 2.62                      | <0.001  |
| Waist circumference (cm)         | 72.03 ± 7.62                             | 79.41 ± 6.79                      | <0.001  |
| Fat percentage (%)               | 24.81 ± 6.36                             | 30.16 ± 6.90                      | <0.001  |
| SBP (mmHg)                       | 121.13 ± 16.16                           | 127.79 ± 13.80                    | 0.002   |
| DBP (mmHg)                       | 79.41 ± 9.47                             | 84.76 ± 8.30                      | <0.001  |
| ALT (IU/L) <sup>§</sup>          | 14.00 (11.00-18.00)                      | 15.00 (12.00-20.00)               | 0.013   |
| AST (IU/L) <sup>§</sup>          | 19.00 (16.00-22.00)                      | 21.00 (17.00-23.50)               | 0.032   |
| GGT (IU/L) <sup>§</sup>          | 16.00 (13.00-22.00)                      | 19.00 (15.00-24.50)               | 0.033   |
| TC (mmol/L)                      | 4.58 ± 1.01                              | 4.99 ± 0.96                       | 0.002   |
| TG (mmol/L) <sup>§</sup>         | 1.03 (0.74-1.38)                         | 1.62 (1.05-1.94)                  | <0.001  |
| HDL-C (mmol/L)                   | 1.41 ± 0.30                              | 1.30 ± 0.21                       | 0.005   |
| LDL-C (mmol/L)                   | 2.81 ± 0.85                              | 3.08 ± 0.79                       | 0.015   |
| FPG (mmol/L)                     | 5.16 ± 1.05                              | 5.15 ± 0.78                       | 0.948   |
| 2hPG (mmol/L)                    | 5.99 ± 2.16                              | 6.98 ± 2.72                       | 0.001   |
| HbA1c (%)                        | 5.61 ± 0.81                              | 5.72 ± 0.50                       | 0.284   |
| HOMA-%B <sup>§</sup>             | 67.58 (46.25-96.50)                      | 78.49 (55.02-118.78)              | 0.022   |
| HOMA-IR <sup>§</sup>             | 1.15 (0.79-1.56)                         | 1.42 (1.07-1.81)                  | 0.013   |
| Adiponectin (µg/ml) <sup>§</sup> | 9.00 (6.40-13.57)                        | 7.76 (5.29-11.64)                 | 0.033   |
| FGF21 (pg/ml) <sup>§</sup>       | 199.1 (123.56-322.8)                     | 309.79 (169.11-506.43)            | <0.001  |
| CK18 M30 (U/L) <sup>§</sup>      | 87.12 (59.58-137.43)                     | 77.96 (56.60-112.22)              | 0.240   |
| CK18 M65ED (U/L) <sup>§</sup>    | 147.2 (98.90-234.90)                     | 172.65 (112.98-301.05)            | 0.049   |

Data are means ± SD or median (interquartile range). <sup>§</sup>Ln transformed before analysis.

**Supplementary Table S3** Baseline parameters predictive of NAFLD remission at 3 years in patients who had NAFLD at baseline, examined using logistic regression.

| Baseline variables  | Model 1             | Model 2              | Model 3             | Model 4              | Model 5              |
|---------------------|---------------------|----------------------|---------------------|----------------------|----------------------|
| BMI                 |                     |                      |                     | 0.980 (0.746-1.286)  |                      |
| Waist circumference |                     |                      |                     | 0.899 (0.809-0.999)* |                      |
| LDL-C               |                     |                      |                     | 0.525 (0.269-1.025)  |                      |
| FPG                 |                     |                      |                     | 0.819 (0.549-1.223)  |                      |
| Exercise            |                     |                      |                     |                      | 2.845 (1.097-7.380)* |
| Diet control        |                     |                      |                     |                      | 0.624 (0.208-1.871)  |
| FGF21               | 0.673 (0.341-1.331) |                      |                     |                      |                      |
| CK18 M30            |                     | 0.346 (0.147-0.814)* |                     | 0.364 (0.141-0.936)* | 0.356 (0.147-0.859)* |
| CK18 M65ED          |                     |                      | 1.099 (0.649-1.862) |                      |                      |

Data are odds ratio (OR) (95%CI).

Model 1. Included only baseline FGF21 level.

Model 2. Included only baseline CK18 M30 level.

Model 3. Included only baseline CK18 M65ED level.

Model 4. Included BMI, waist circumference, LDL-C, FPG and CK18 M30.

Model 5. Included exercise, diet control and CK18 M30.

\*  $P < 0.05$ .

**Supplementary Table S4** Baseline parameters predictive of suspected NASH at 3 years in patients who had NAFLD at baseline and sustained NAFLD during follow-up, examined using logistic regression.

| Baseline variables | Model 1             | Model 2              | Model 3              | Model 4              | Model 5              | Model 6              |
|--------------------|---------------------|----------------------|----------------------|----------------------|----------------------|----------------------|
| Age                |                     |                      |                      | 0.935 (0.880-0.994)* | 0.915 (0.859-0.975)* |                      |
| SBP                |                     |                      |                      | 0.949 (0.900-1.002)  | 0.954 (0.904-1.006)  |                      |
| AST                |                     |                      |                      | 1.946 (0.307-12.345) | 1.160 (0.139-9.682)  |                      |
| GGT                |                     |                      |                      | 1.702 (0.564-5.139)  | 1.771 (0.563-5.566)  |                      |
| Exercise           |                     |                      |                      |                      |                      | 0.663 (0.163-2.695)  |
| Diet control       |                     |                      |                      |                      |                      | 1.739 (0.541-5.594)  |
| FGF21              | 0.738 (0.342-1.589) |                      |                      |                      |                      |                      |
| CK18 M30           |                     | 3.521 (1.409-8.798)* |                      | 2.789 (0.932-8.344)  |                      |                      |
| CK18 M65ED         |                     |                      | 2.897 (1.412-5.944)* |                      | 3.250 (1.196-8.826)* | 2.920 (1.398-6.100)* |

Data are odds ratio (OR) (95%CI).

Model 1. Included only baseline FGF21 level.

Model 2. Included only baseline CK18 M30 level.

Model 3. Included only baseline CK18 M65ED level.

Model 4. Included age, SBP, AST, GGT and CK18 M30.

Model 5. Included age, SBP, AST, GGT and CK18 M65ED.

Model 6. Included exercise, diet control and CK18 M65ED.

\*  $P < 0.05$ .
